# Supplementary material for: Solvent-free, photoinduced block copolymer synthesis from polymerizable eutectics by simultaneous PET-RAFT and ring-opening polymerization in air
Source: Royal Society of Chemistry journal article supplement (doi:10.1039/d3py00294b), 2023-01-01
Supplement: d3py00294b1.pdf [file d3py00294b1.pdf]

## Electronic Supplementary Information

### **Solvent-free, photoinduced block copolymer synthesis from polymerizable eutectics by simultaneous PET-RAFT and ring-opening polymerization in air**

Yeasmin Nahar,<sup>a</sup> Melissa K. Stanfield,<sup>a</sup> Alex C. Bissember<sup>a</sup> and Stuart C. Thickett<sup>a\*</sup>

<sup>a</sup> School of Natural Sciences – Chemistry, University of Tasmania, Hobart TAS 7001 Australia

\* Corresponding author: [stuart.thickett@utas.edu.au](mailto:stuart.thickett@utas.edu.au)

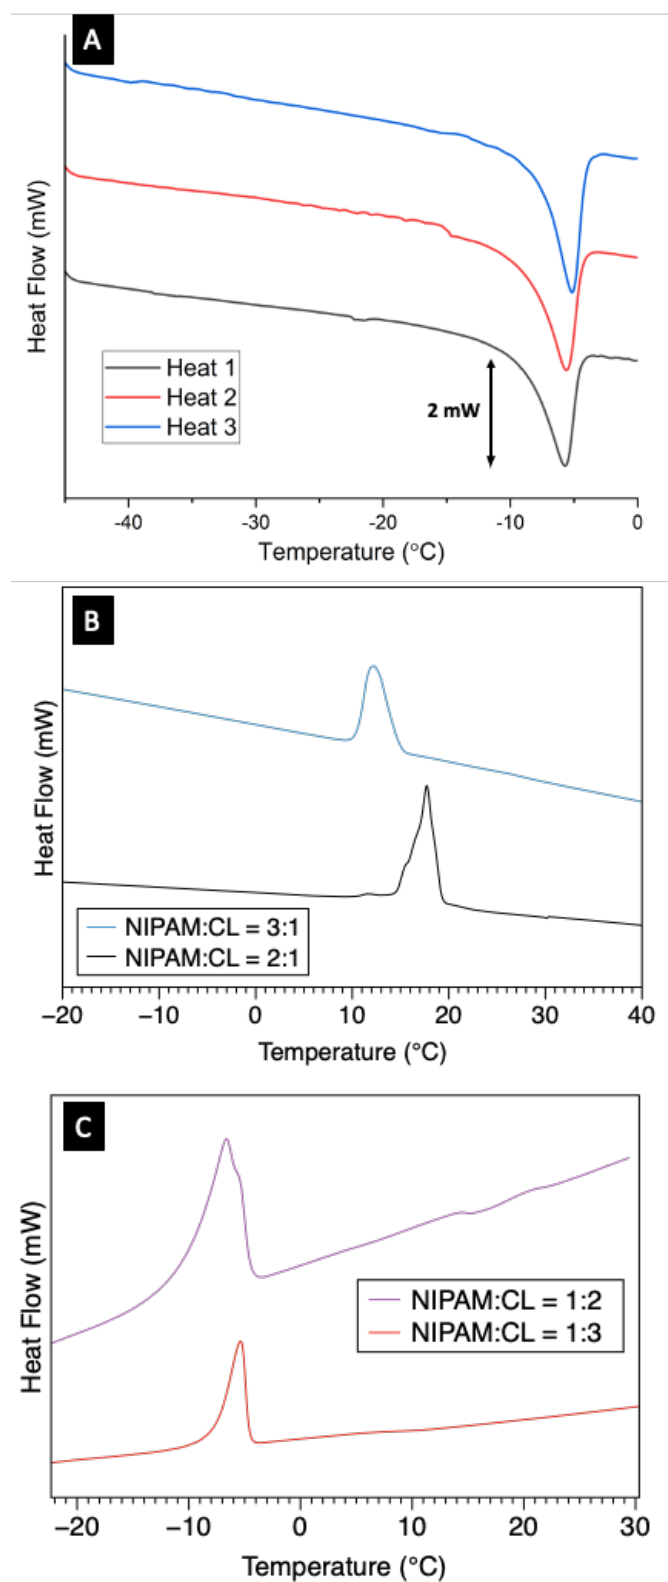

**Fig S1.** DSC thermograms of various mixtures prepared at different NIPAM:CL mole ratios. Shown are (A) heating thermograms of the 1:1 NIPAM:CL mixture (heating rate 2 °C min<sup>-1</sup>), to accompany the data in Figure 1B and (B,C) cooling cycles of other NIPAM:CL mixtures (cooling rate 2 °C min<sup>-1</sup>). Exothermic transitions are in the positive y direction; second loops shown in panels B and C. Data offset for clarity.

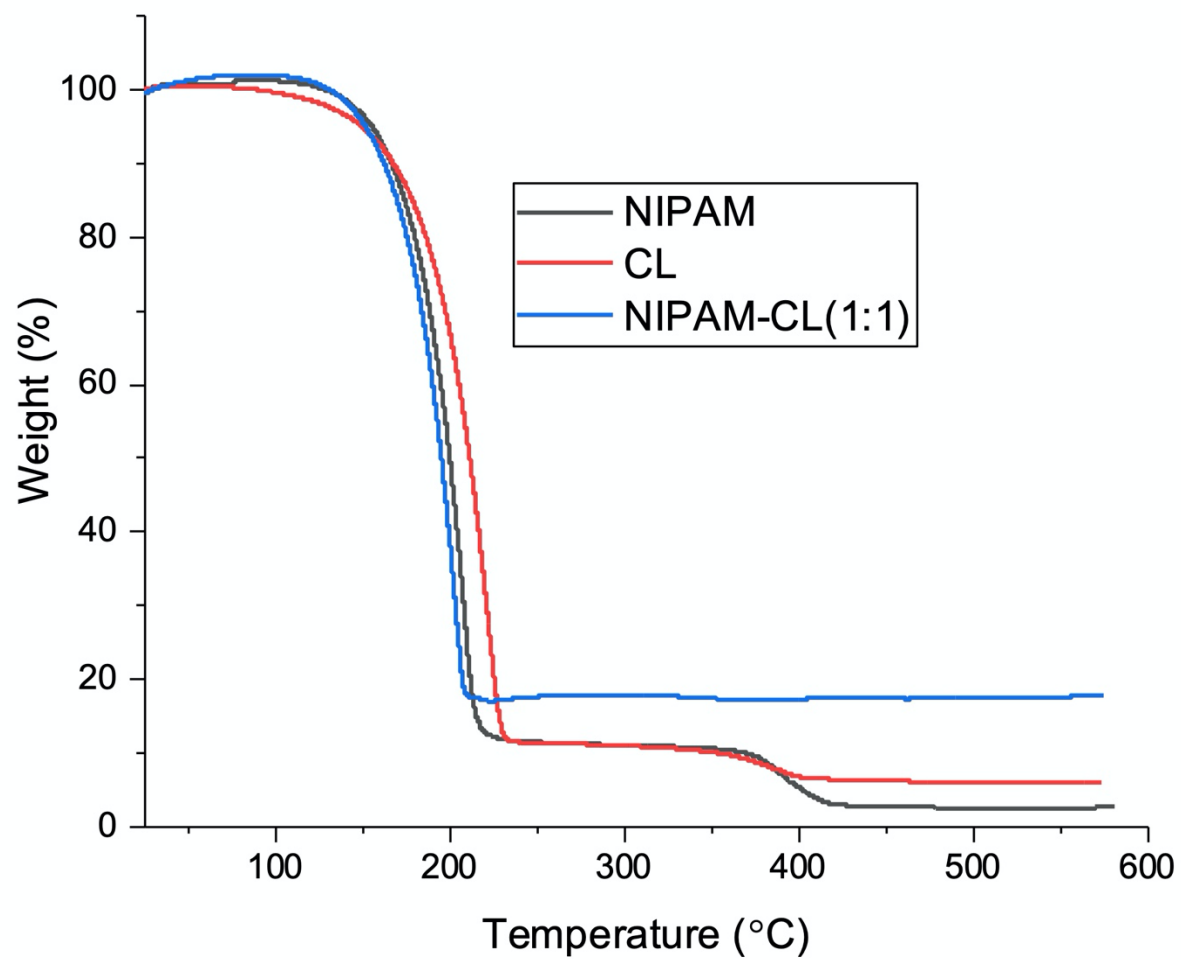

**Fig S2.** TGA analysis of 1:1 NIPAM:CL eutectic (blue), NIPAM (black) and CL (red). Heating rate was 10 °C min<sup>-1</sup> in a nitrogen atmosphere.

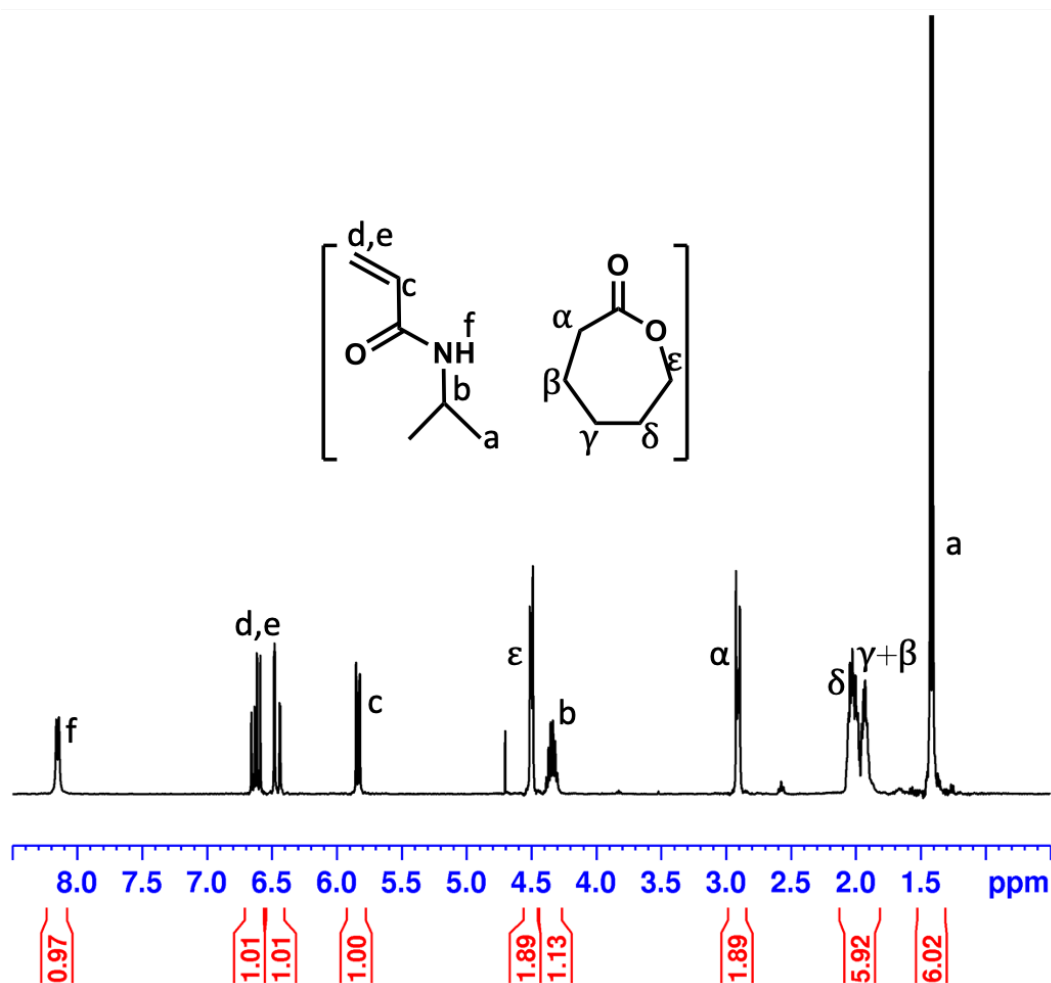

**Fig S3.**  $^1\text{H}$  NMR spectrum of 1:1 NIPAM:CL eutectic. The spectrum was acquired by placing  $\text{D}_2\text{O}$  in a sealed capillary tube within the NMR sample tube to lock and shim the sample; spectrum was indirectly referenced to sodium trimethylsilylpropanesulfonate.

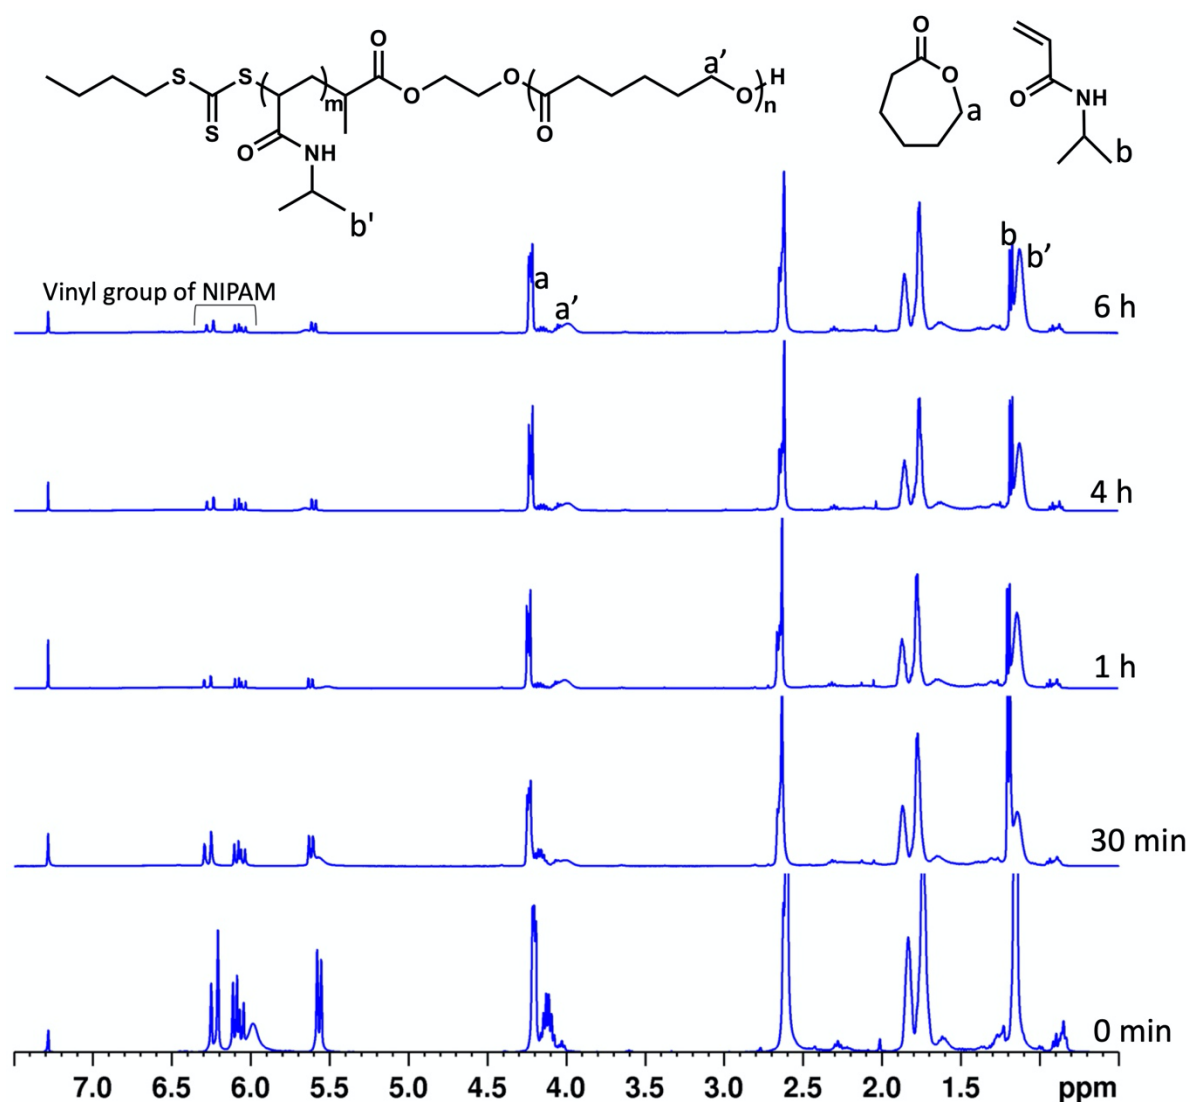

**Fig S4.**  $^1\text{H}$  NMR spectra of the 1:1 NIPAM:CL eutectic in  $\text{CDCl}_3$  performed at the specified time intervals during the simultaneous PET-RAFT and ROP polymerisation to prepare PNIPAM-*b*-PCL block copolymers.

Theoretical molar masses were calculated by the equation:

$$M_{n,\text{theo}} = MW_{\text{HCTA}} + \alpha^1 \times DP_{\text{NIPAM}} \times MW_{\text{NIPAM}} + \alpha^2 \times DP_{\text{CL}} \times MW_{\text{CL}}$$

where  $\alpha^1$  and  $\alpha^2$  represent the fractional conversion of NIPAM and CL.  $DP_{\text{NIPAM}}$  and  $DP_{\text{CL}}$  represent the targeted degree of polymerization of NIPAM and CL respectively, in this case 60 units each.

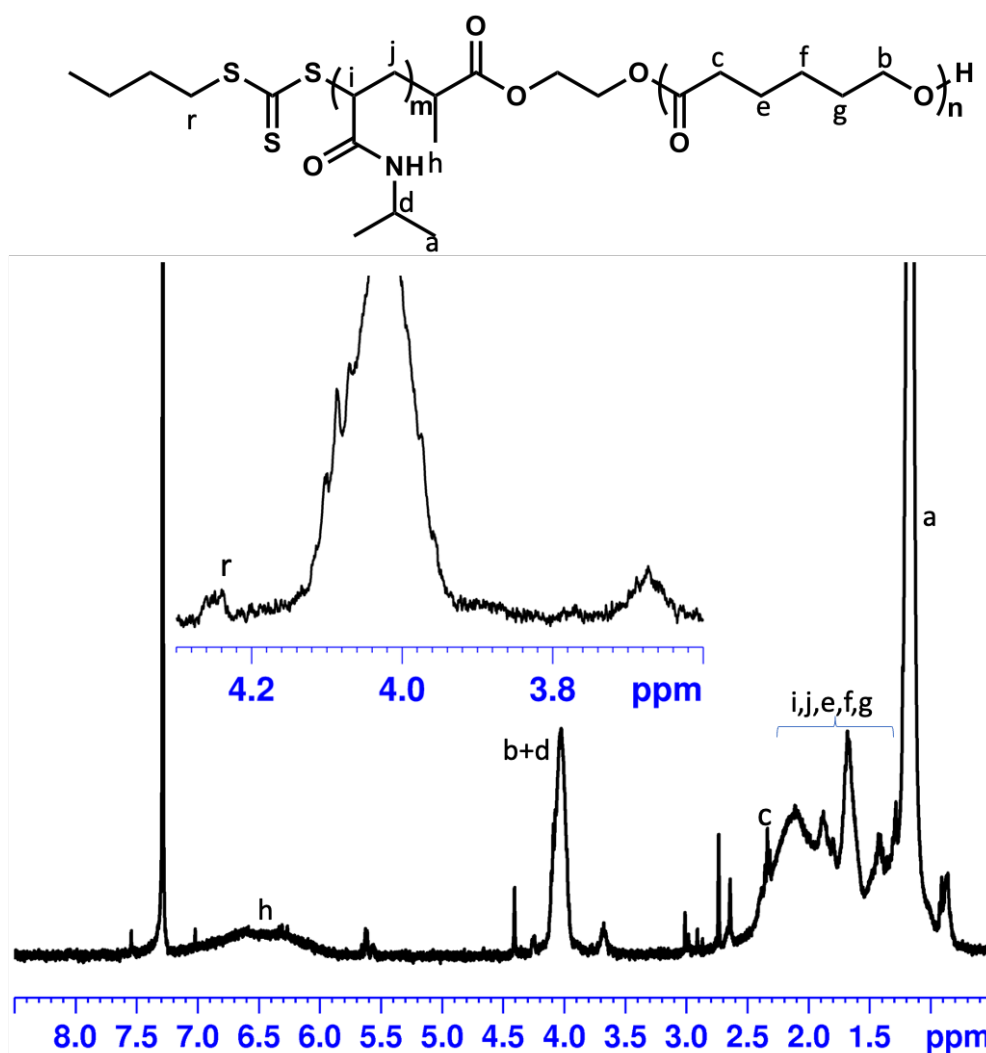

**Fig S5.**  $^1\text{H}$  NMR spectrum of PNIPAM-*b*-PCL copolymer in  $\text{CDCl}_3$ .

The peak at  $\delta_{\text{H}}$  4.05 ppm is assigned to the  $\text{OCH}_2$  in PCL and the isopropyl proton in PNIPAM. Characteristic peaks of the methyl group and  $\text{N-H}$  of NIPAM at  $\delta_{\text{H}}$  1.11 and 6.5 ppm are clearly observable in addition to PCL and PNIPAM backbone peaks. Integration of methylene group of HEBCP at  $\delta_{\text{H}}$  3.38 ppm relative to the integration of peaks at  $\delta_{\text{H}}$  4.05 and 6.50 ppm indicated that PNIPAM-*b*-PCL contained 52 repeating units of NIPAM and 28 repeating units of CL.

The molar mass of the block copolymer was calculated as 9392 Da via the equation

$$M_{n,\text{NMR}} = \text{MW}_{\text{HCTA}} + m \times \text{MW}_{\text{NIPAM}} + n \times \text{MW}_{\text{CL}}$$

where  $m, n$  are the number of repeating units of NIPAM and CL respectively.

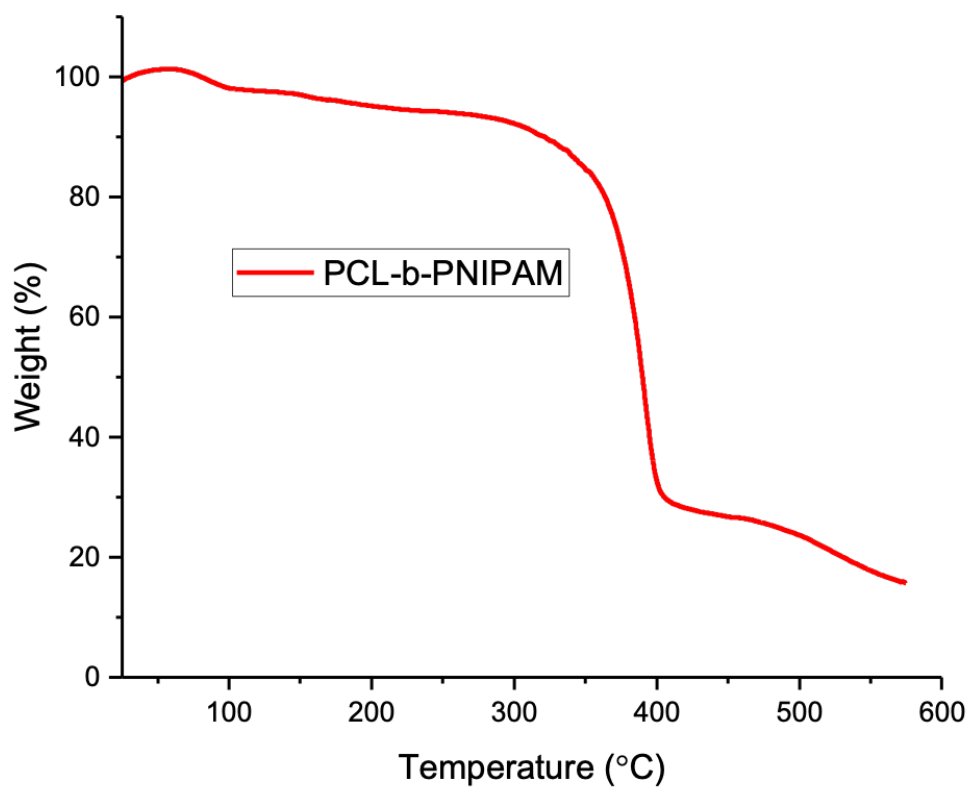

**Fig S6.** TGA of PNIPAM-b-PCL copolymer, performed at 10 °C min<sup>-1</sup> in a nitrogen atmosphere.

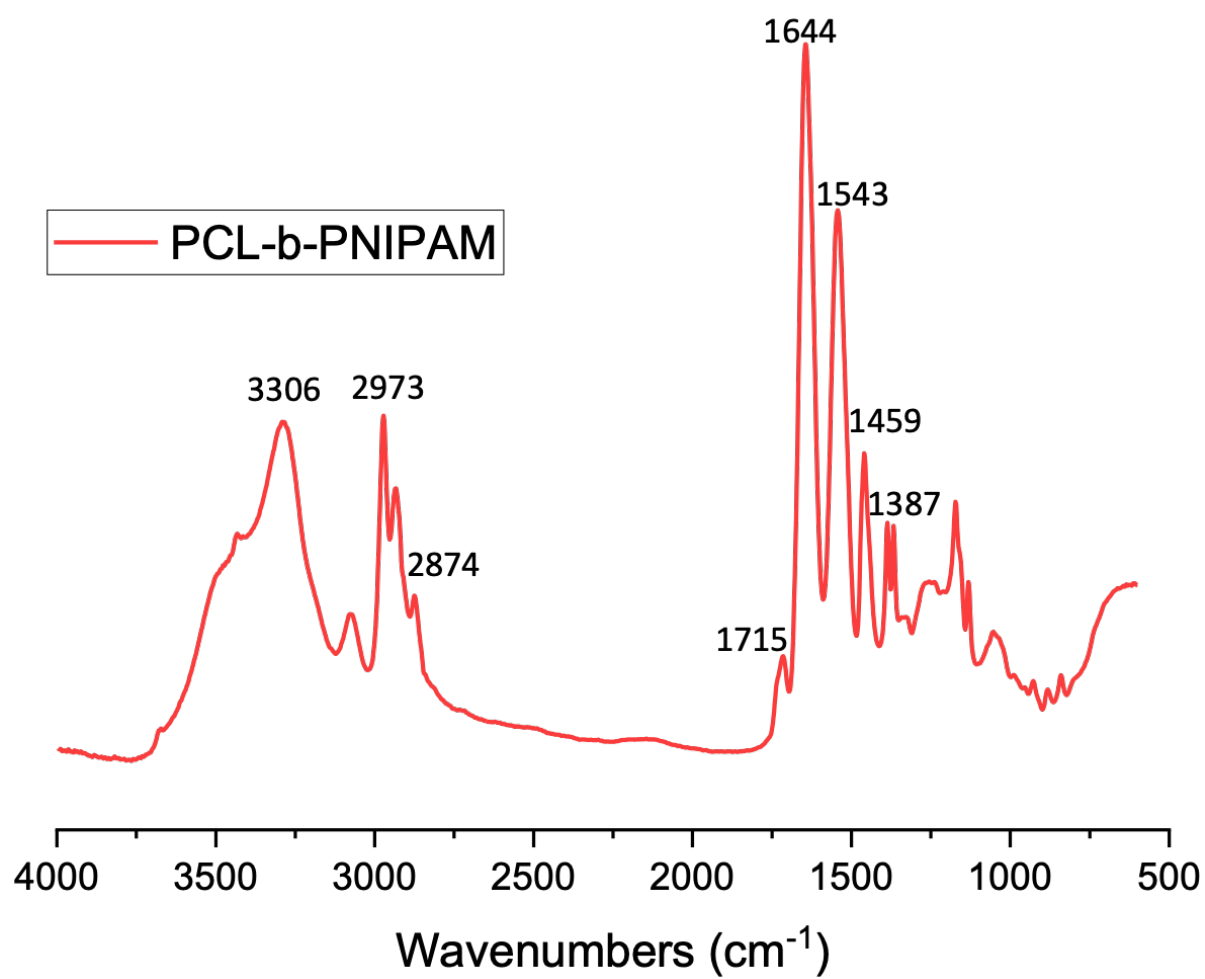

**Fig S7.** ATR-IR spectrum of PNIPAM-b-PCL.

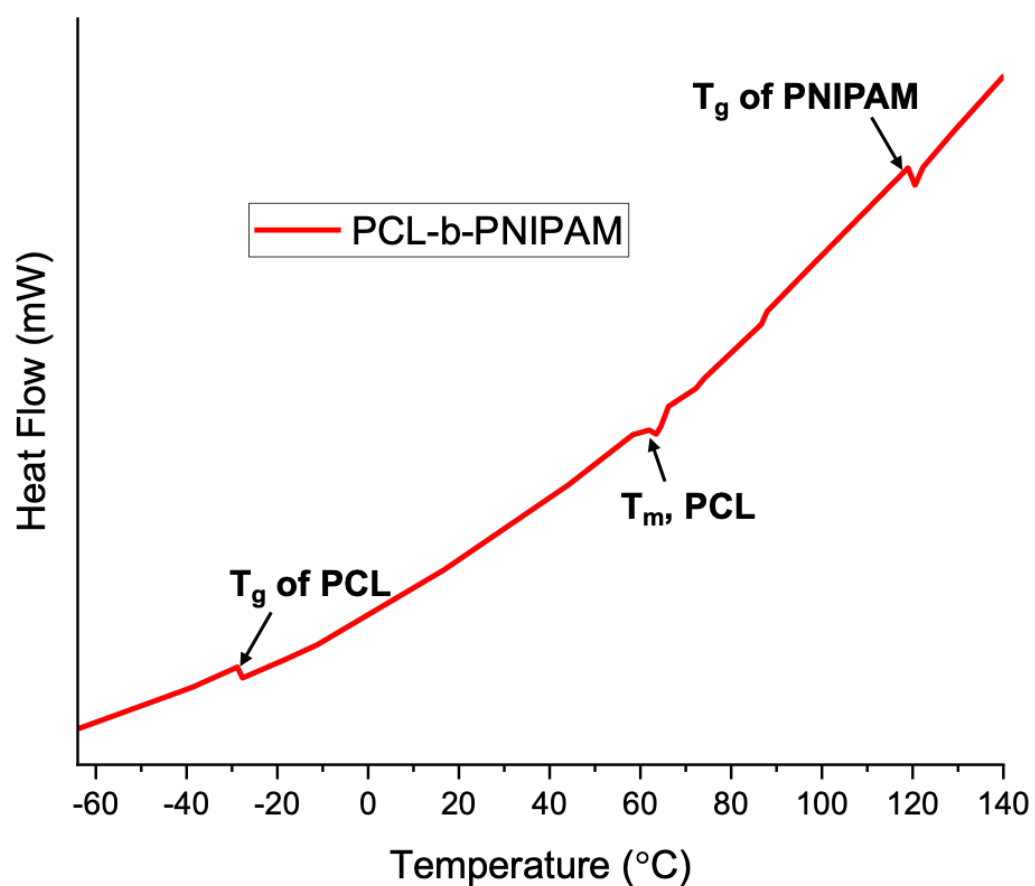

**Fig S8.** DSC trace of PNIPAM-b-PCL, collected at a heating rate of 2 °C min<sup>-1</sup>

DSC analysis of the block copolymer reported in the manuscript exhibits a melting point at 63 °C, attributed to the PCL block. Glass transitions were observed at – 30 °C and 122 °C respectively.

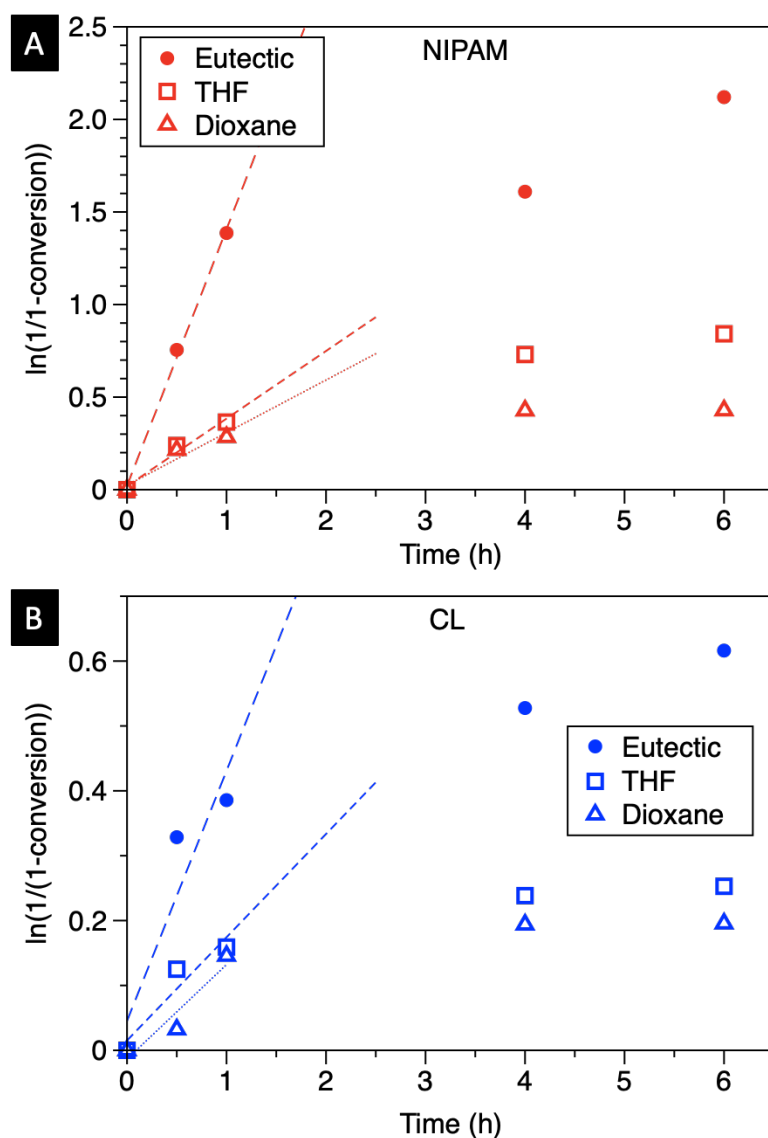

**Fig S9.** Semi-logarithmic plots to determine the pseudo-first order polymerization rate  $k_p^{\text{app}}$  for both (A) NIPAM and (B) CL in a 1:1 eutectic (filled circles), THF (open squares) and 1,4-dioxane (open triangles).

**Table S1.** Pseudo-first order rate coefficient for the rate of polymerization of both NIPAM and CL within the first hour of polymerization (based on the linear fits in the above figure).

| System      | NIPAM $k_p^{\text{app}}$ ( $\text{h}^{-1}$ ) | CL $k_p^{\text{app}}$ ( $\text{h}^{-1}$ ) |
|-------------|----------------------------------------------|-------------------------------------------|
| Eutectic    | $1.39 \pm 0.07$                              | $0.39 \pm 0.16$                           |
| THF         | $0.37 \pm 0.06$                              | $0.16 \pm 0.05$                           |
| 1,4-dioxane | $0.28 \pm 0.08$                              | $0.15 \pm 0.05$                           |
